# Supplementary material for: Halogen substitutions leading to enhanced oxygen evolution and oxygen reduction reactions in metalloporphyrin frameworks
Source: Royal Society of Chemistry journal article supplement (doi:10.1039/c7cp06187k), 2017-01-01
Supplement: c7cp06187k1.pdf [file c7cp06187k1.pdf]

## Supporting Information

### Halogen Substitutions Leading to Enhance Oxygen Evolution and Oxygen Reduction Reactions in Metalloporphyrin Frameworks

Sippakorn Wannakao<sup>†\*</sup>, Thana Maihom<sup>‡</sup>, Kanokwan Kongpatpanich<sup>†</sup>, Jumras Limtrakul<sup>†</sup>, and Vinich Promarak<sup>†\*</sup>

<sup>†</sup>Department of Materials Science and Engineering, School of Molecular Science and Engineering, Vidyasirimedhi Institute of Science and Technology, Rayong 21210, Thailand

<sup>‡</sup>Department of Chemistry, Faculty of Liberal Arts and Science, Kasetsart University, Kamphaeng Saen Campus, Nakhon Pathom 73140, Thailand

\*Corresponding authors: sippakorn.w@vistec.ac.th and vinich.p@vistec.ac.th

**Table S1.** Free energy corrections ( $G_{\text{corr}}$ ), including, zero-point energy (ZPE), and entropic corrections (TS term) and solvent corrections ( $G_{\text{solv}}$ ) to gasphase and adsorbed species taken from ref 17. All energies are in eV unit.

| Species                         | ZPE  | TS   | $G_{\text{solv}}$ | $G_{\text{corr}}$ |
|---------------------------------|------|------|-------------------|-------------------|
| H <sub>2</sub> O <sub>(l)</sub> | 0.56 | 0.67 | 0.00              | -0.11             |
| H <sub>2</sub> <sub>(g)</sub>   | 0.27 | 0.41 | 0.00              | -0.14             |
| *O                              | 0.07 | 0.00 | 0.00              | 0.07              |
| *OH                             | 0.36 | 0.00 | -0.30             | 0.06              |
| *OOH                            | 0.39 | 0.00 | -0.30             | 0.09              |

**Table S2.** Free energies of the OER and ORR adsorbates, \*OH, \*O, and \*OOH, in eV unit and overpotentials of the OER and ORR, in V unit, on the metalloporphyrin framework M-Por.

| M  | $\Delta G_{*OH}$ | $\Delta G_{*O}$ | $\Delta G_{*OOH}$ | $\Delta\Delta G$ | $\Delta G_1$ | $\Delta G_2$ | $\Delta G_3$ | $\Delta G_4$ | $\eta^{OER}$ | $\eta^{ORR}$ |
|----|------------------|-----------------|-------------------|------------------|--------------|--------------|--------------|--------------|--------------|--------------|
| Cr | 0.17             | 0.83            | 3.39              | 3.22             | 0.17         | 0.66         | 2.55         | 1.53         | 1.32         | 1.06         |
| Mn | 0.42             | 1.45            | 3.76              | 3.35             | 0.42         | 1.03         | 2.32         | 1.16         | 1.09         | 0.81         |
| Fe | 0.60             | 1.44            | 3.56              | 2.96             | 0.60         | 0.84         | 2.12         | 1.36         | 0.89         | 0.63         |
| Co | 0.93             | 2.75            | 3.88              | 2.95             | 0.93         | 1.82         | 1.14         | 1.04         | 0.59         | 0.30         |
| Ni | 2.04             | 4.35            | 4.86              | 2.82             | 2.04         | 2.31         | 0.51         | 0.06         | 1.08         | 1.17         |
| Cu | 2.64             | 4.62            | 5.08              | 2.45             | 2.64         | 1.98         | 0.46         | -0.16        | 0.75         | 1.39         |
| Zn | 1.99             | 4.57            | 4.88              | 2.89             | 1.99         | 2.58         | 0.32         | 0.04         | 1.35         | 1.19         |
| Ru | -0.05            | 0.64            | 2.91              | 2.96             | -0.05        | 0.69         | 2.28         | 2.01         | 1.05         | 1.28         |
| Rh | 0.59             | 2.42            | 3.58              | 2.99             | 0.59         | 1.83         | 1.16         | 1.34         | 0.60         | 0.64         |
| Pd | 2.35             | 4.84            | 5.03              | 2.68             | 2.35         | 2.50         | 0.18         | -0.11        | 1.27         | 1.34         |
| Ag | 2.47             | 5.00            | 5.00              | 2.53             | 2.47         | 2.53         | 0.00         | -0.08        | 1.30         | 1.31         |
| Ir | 0.62             | 2.20            | 3.66              | 3.04             | 0.62         | 1.58         | 1.47         | 1.26         | 0.35         | 0.61         |
| Pt | 2.31             | 4.63            | 5.05              | 2.74             | 2.31         | 2.32         | 0.42         | -0.13        | 1.09         | 1.36         |
| Au | 2.00             | 4.63            | 4.77              | 2.77             | 2.00         | 2.64         | 0.13         | 0.15         | 1.41         | 1.10         |

**Table S3.** Magnetic moment projected per metal site for each reaction step.

| M  | *   | *OH | *O  | *OOH |
|----|-----|-----|-----|------|
| Cr | 2.9 | 1.4 | 0.0 | 2.1  |
| Mn | 2.9 | 2.0 | 1.5 | 1.8  |
| Fe | 1.8 | 1.5 | 0.9 | 0.7  |
| Co | 0.9 | 0.0 | 1.2 | 0.0  |
| Ni | 0.0 | 0.5 | 0.5 | 0.3  |
| Cu | 0.6 | 0.0 | 0.7 | 0.5  |
| Zn | 0.0 | 0.0 | 0.0 | 0.0  |
| Ru | 1.0 | 0.5 | 0.4 | 0.4  |
| Rh | 0.5 | 0.0 | 0.2 | 0.0  |
| Pd | 0.0 | 0.3 | 0.0 | 0.1  |
| Ag | 0.4 | 0.3 | 0.2 | 0.3  |
| Ir | 0.4 | 0.0 | 0.2 | 0.0  |
| Pt | 0.0 | 0.2 | 0.0 | 0.0  |
| Au | 0.0 | 0.0 | 0.0 | 0.0  |

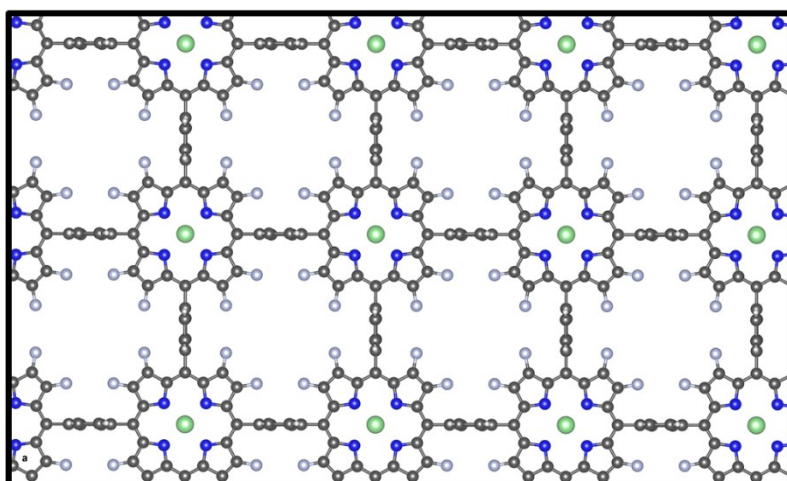

Co-Por-F

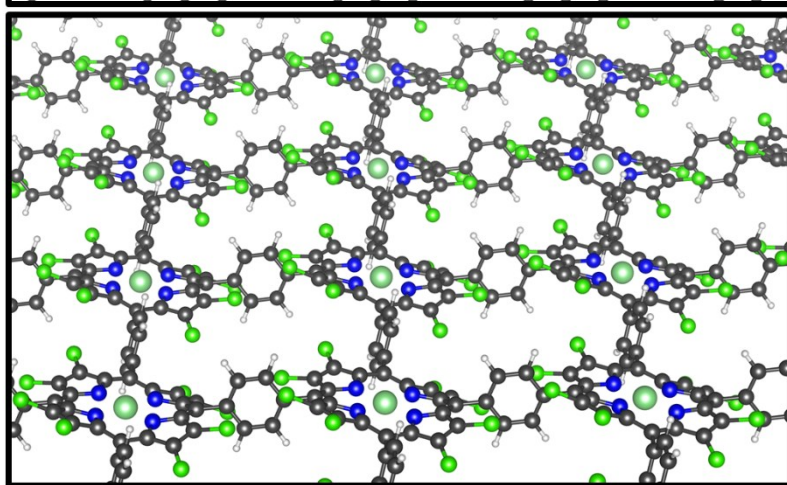

Co-Por-Cl

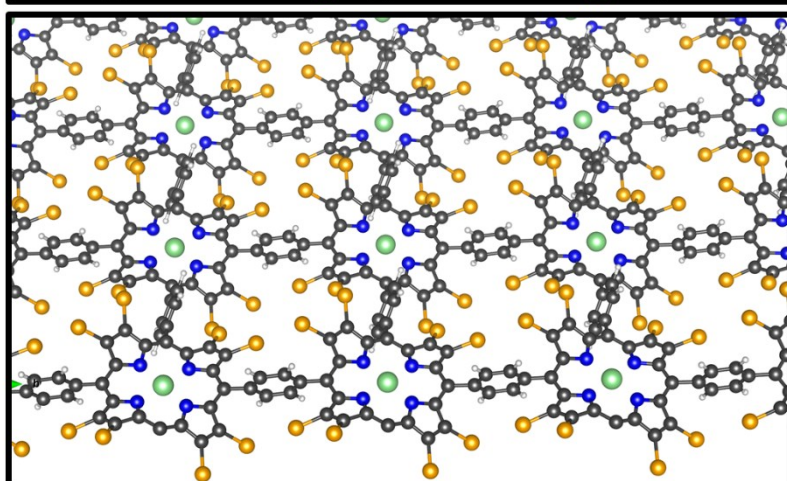

Co-Por-Br

**Figure S1.** Flat 2D structure of Co-Por-F and distorted structure Co-Por-Cl and Co-Por-Br due to steric effect of Cl and Br atoms.

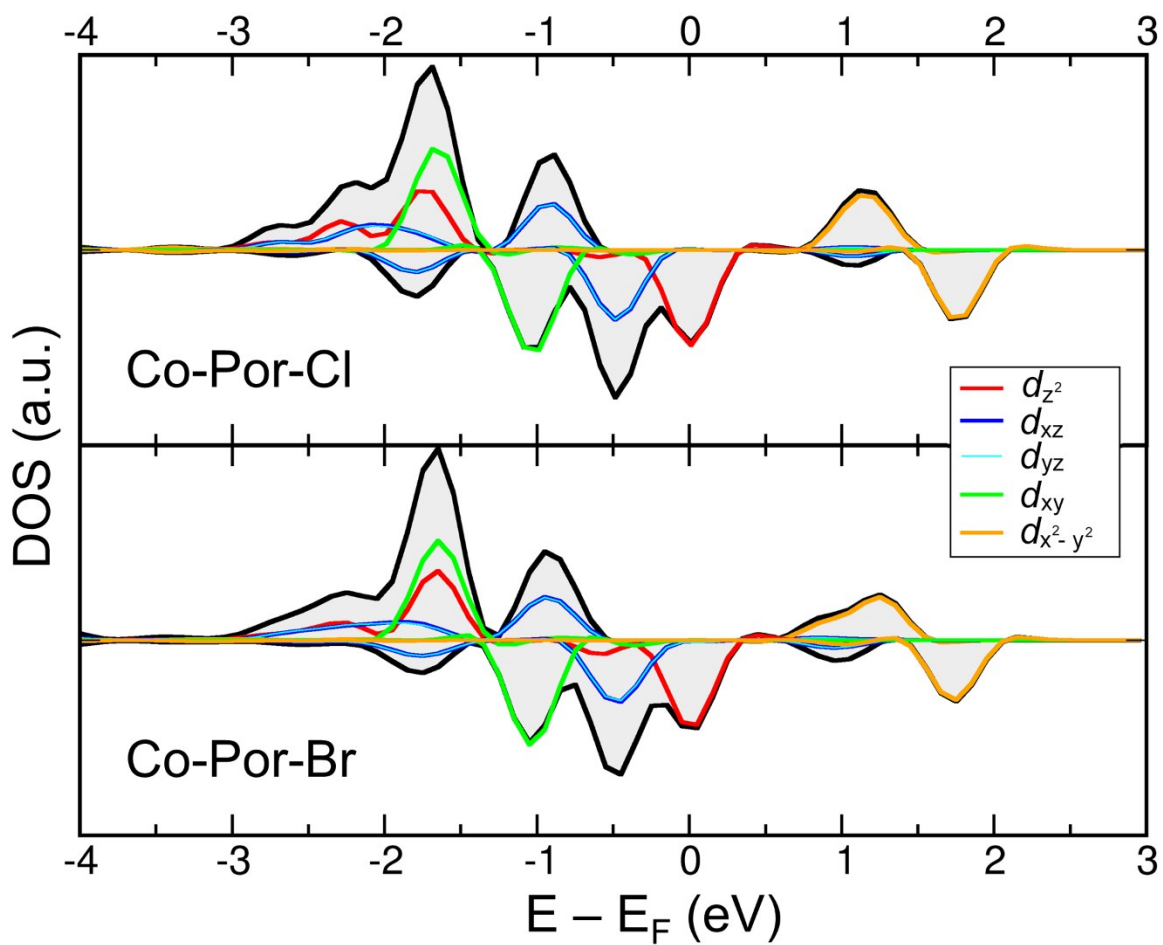

**Figure S2.** Projected density of state of each d-component of Co atom on Co-Por-Cl and Co-Por-Br

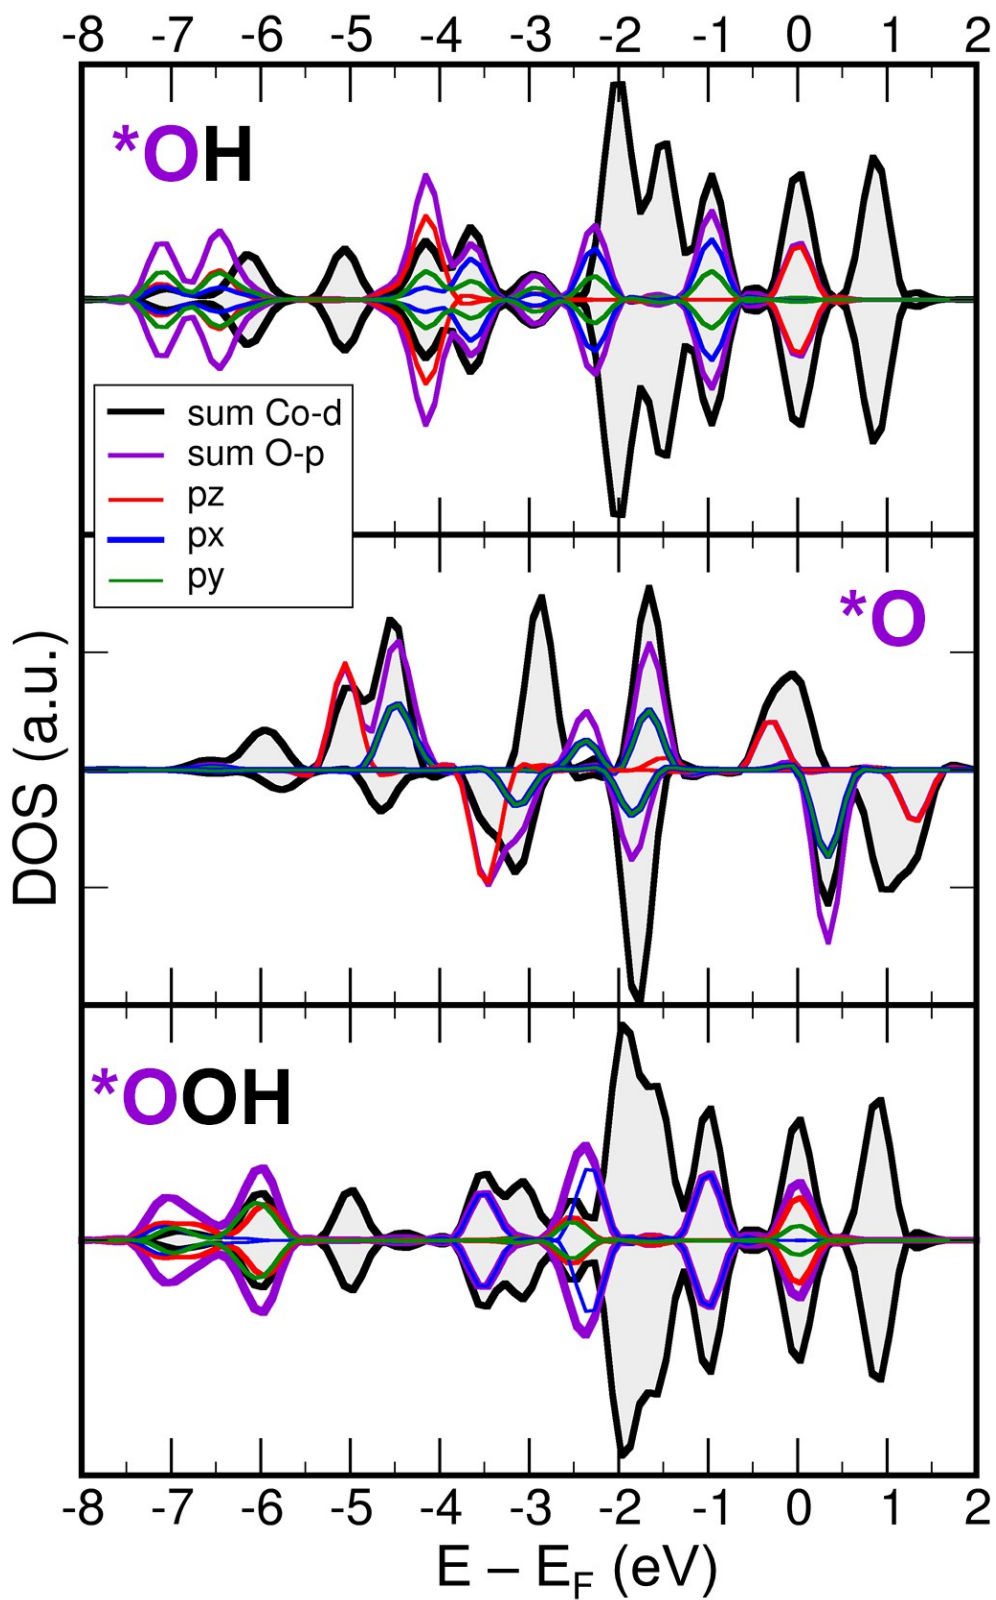

**Figure S3** Projected density of states of *p*-components of O atom at intermediate adsorbing states on the Co-Por catalyst. Spin up and down states are shown.

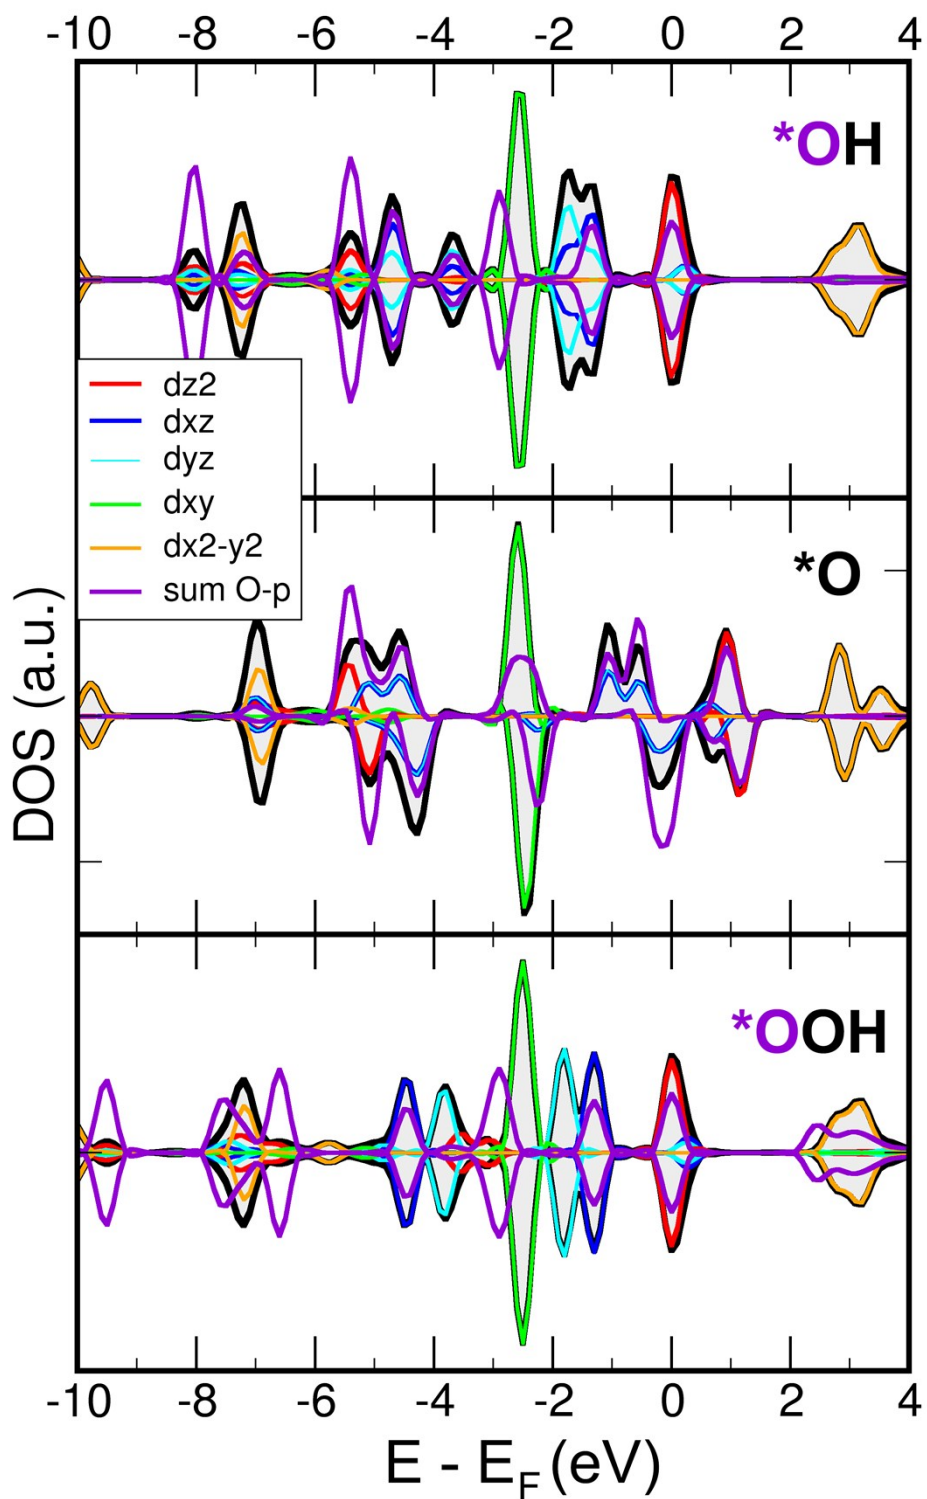

**Figure S4.** Projected density of states (PDOS) of the  $d$ -components of the Ir atom and of the  $p$ -components of the O atom of intermediate adsorbing states on the Ir-Por catalyst. Spin up and down states are shown.



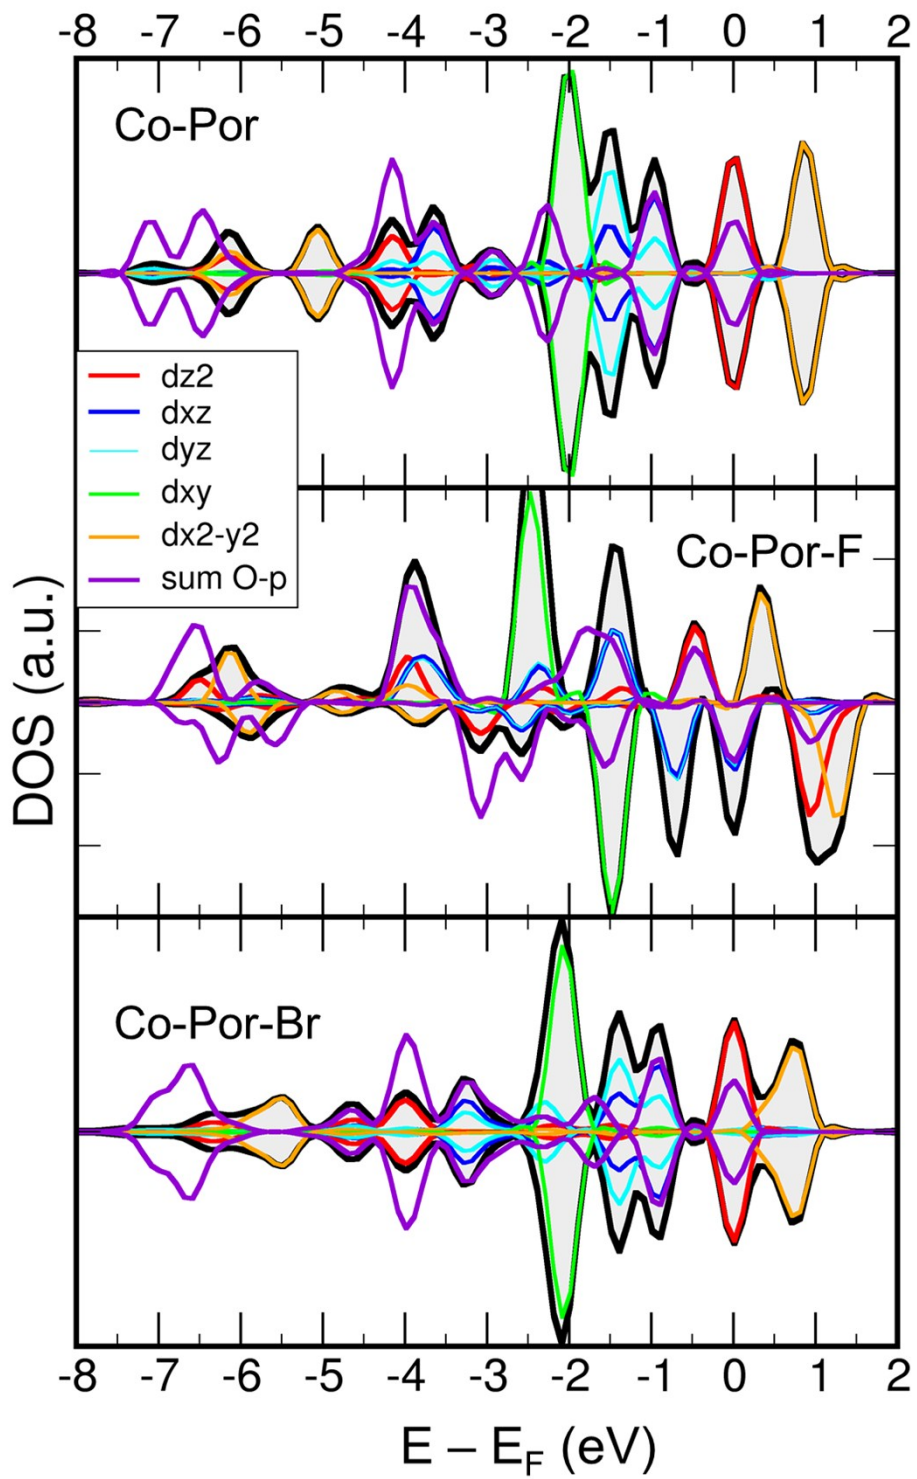

**Figure S5** Projected density of states of  $d$ -components of Co atom and  $p$ -components of O atom of  $^*OH$  adsorbing states on the Co-Por, Co-Por-F, and Co-Por-Br catalyst. Spin up and down states are shown.



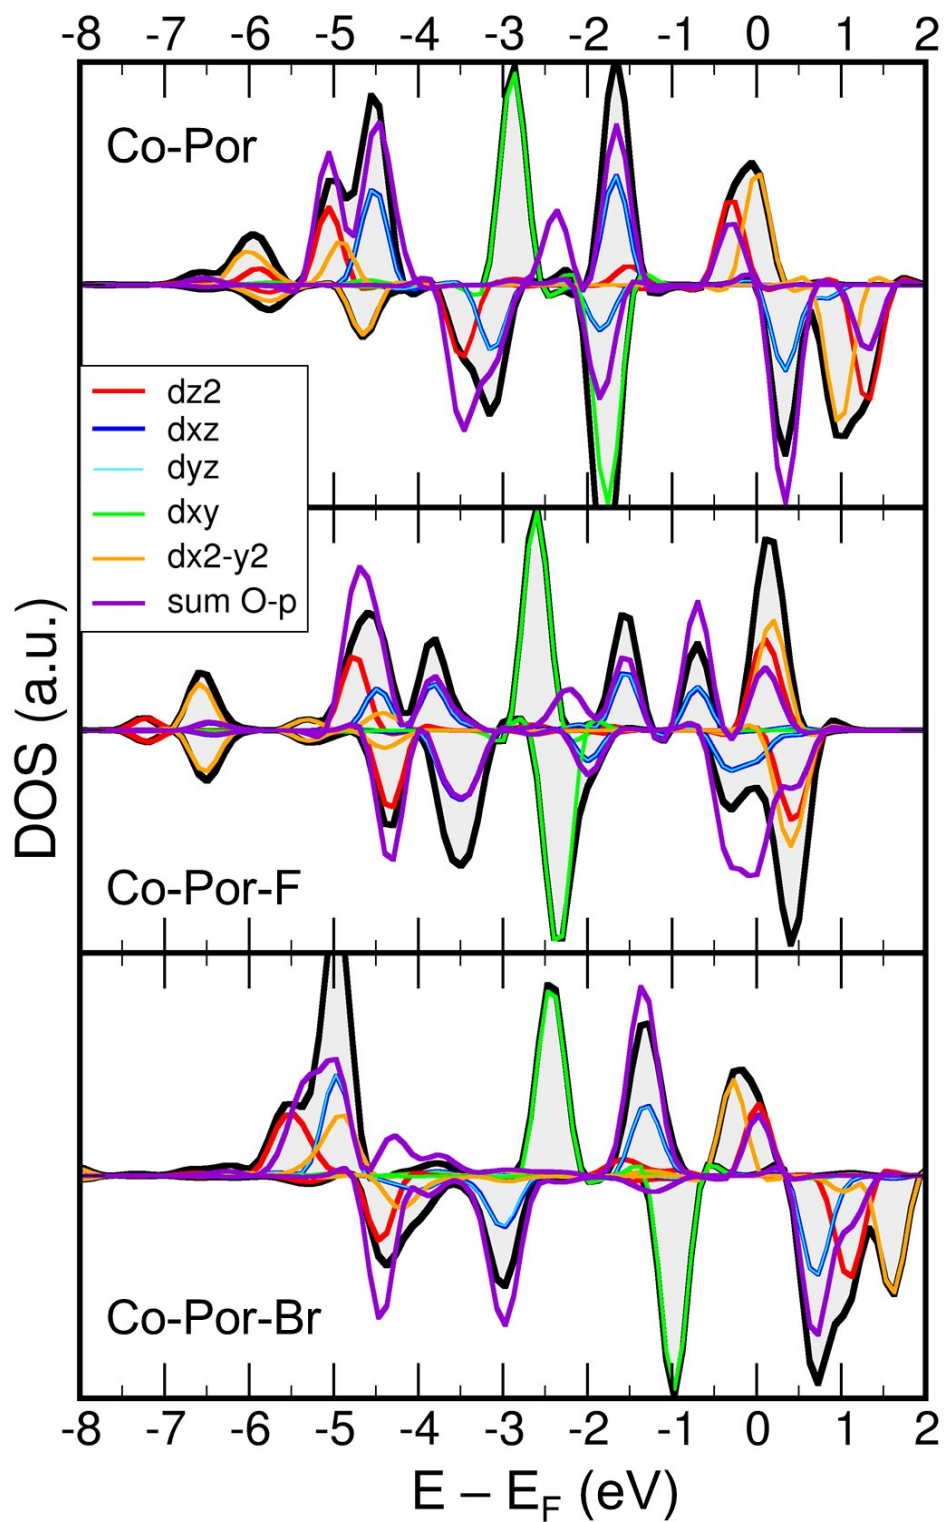

**Figure S6** Projected density of states of *d*-components of Co atom and *p*-components of O atom of <sup>\*</sup>O adsorbing states on the Co-Por, Co-Por-F, and Co-Por-Br catalyst. Spin up and down states are shown.

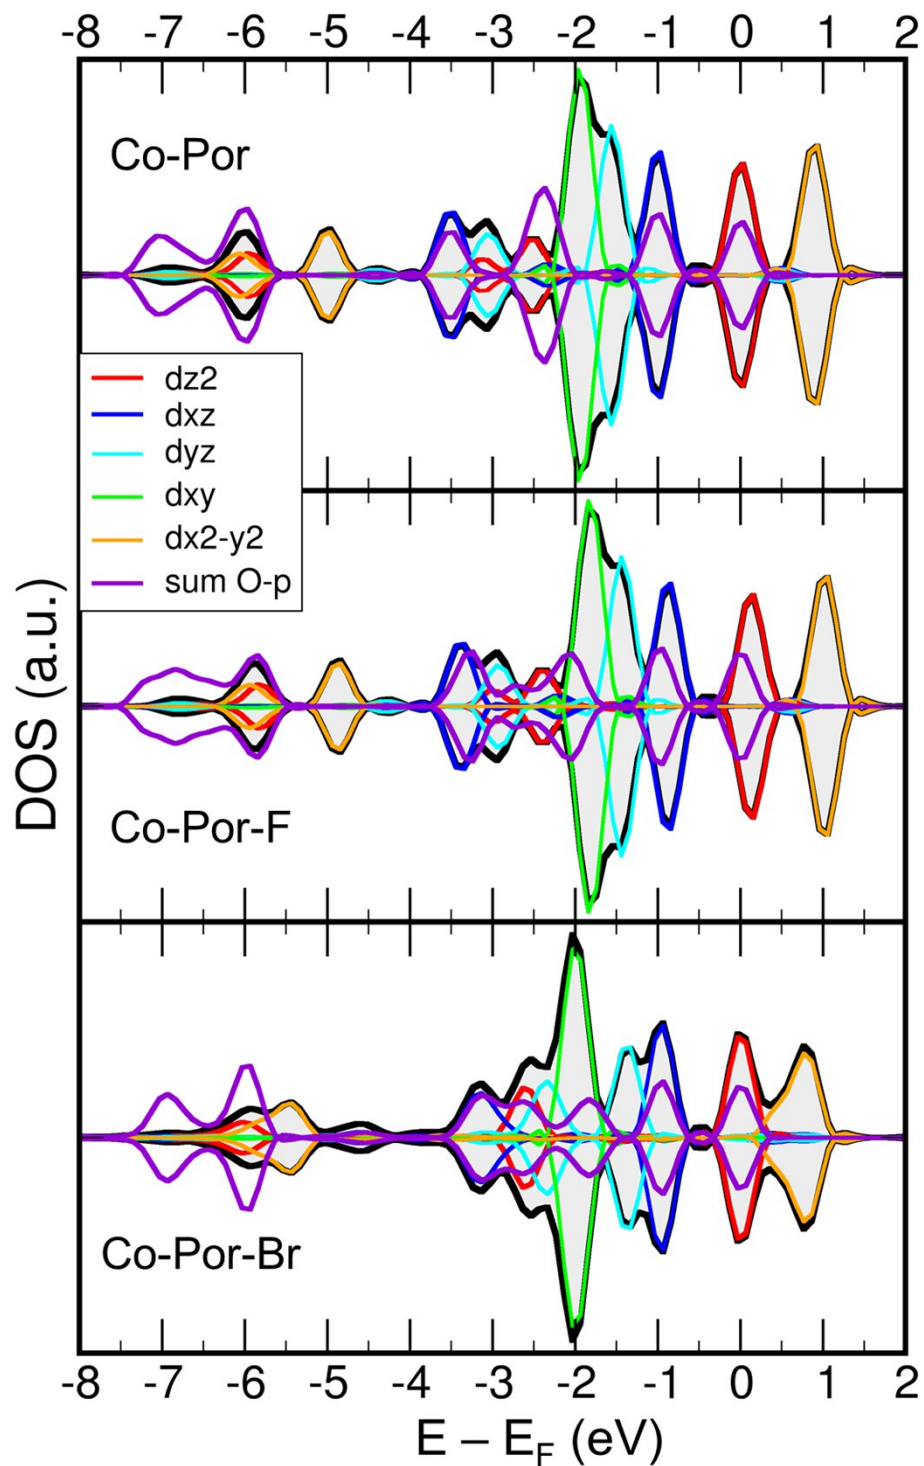

**Figure S7** Projected density of states of *d*-components of Co atom and *p*-components of O atom of \*OOH adsorbing states on the Co-Por, Co-Por-F, and Co-Por-Br catalyst. Spin up and down states are shown.
